# Supplementary material for: Species-Specific Response of Corals to Imbalanced Ratios of Inorganic Nutrients
Source: MDPI journal article supplement (doi:10.3390/ijms24043119), 2023-02-04
Supplement: s1 [file s1]

# Species-Specific Response of Corals to Imbalanced Ratios of Inorganic Nutrients

Alice C. A. Blanckaert <sup>1,2</sup>, Tom Biscéré <sup>1</sup>, Renaud Grover <sup>1</sup> and Christine Ferrier-Pagès <sup>1</sup>

<sup>1</sup> Coral Ecophysiology Team, Centre Scientifique de Monaco, 8 Quai Antoine 1er, MC-98000 Monaco, Monaco

<sup>2</sup> IFD-ED 129, Sorbonne Université Sciences (Formerly UPMC Université Paris VI), CEDEX 05, 75005 Paris, France

## Supplementary material

## I Introduction

Table S1: Summary of the impact of different nutrient enrichment (nitrate, ammonium, phosphorus alone or in combination) on different physiological parameters of corals.

Table was based on the results presented by 47 studies. n represents the number of studies that measured this parameter. Nutrient impacts were evaluated as positive (1, green), negative (-1, red) or neutral (0, white), when diverging results were found in the literature an average were calculated.

The purpose of this table was only to have a quick overview of the parameters studied in the literature and the overall impact of nutrient, it is only meant as an informative table.

|                                                     | Coral growth    | Symbiont density | Chlorophyll content | Photosynthetic rates | Tissue parameters | Carbon content | Nitrogen content | Phosphorus content | Reproduction | Survival       | Coral Health   |
|-----------------------------------------------------|-----------------|------------------|---------------------|----------------------|-------------------|----------------|------------------|--------------------|--------------|----------------|----------------|
| NO <sub>3</sub>                                     | -0.38<br>(n=8)  | 0<br>(n=6)       | 0.29<br>(n=7)       | -0.17<br>(n=12)      | 0<br>(n=3)        | 0<br>(n=1)     | 1<br>(n=1)       |                    |              | -0.25<br>(n=4) | -0.83<br>(n=6) |
| NH <sub>4</sub>                                     | -0.3<br>(n=10)  | 0.5<br>(n=8)     | 1<br>(n=6)          | 0.5<br>(n=4)         | 0.4<br>(n=5)      | 0<br>(n=1)     | 0.5<br>(n=2)     | 0<br>(n=1)         | -1<br>(n=2)  |                | 0<br>(n=2)     |
| PO <sub>4</sub>                                     | -0.45<br>(n=11) | 0.4<br>(n=5)     | -0.25<br>(n=4)      | 0.67<br>(n=3)        | 0.67<br>(n=3)     | 0.25<br>(n=4)  | 0.33<br>(n=3)    | 0<br>(n=2)         |              |                |                |
| NO <sub>3</sub> / PO <sub>4</sub>                   | 0<br>(n=6)      | 0<br>(n=1)       | 0.5<br>(n=4)        | 0.33<br>(n=3)        | 0<br>(n=1)        | 0<br>(n=1)     | 1<br>(n=1)       |                    |              |                |                |
| NH <sub>4</sub> / PO <sub>4</sub>                   | -0.3<br>(n=6)   | 0.4<br>(n=5)     | 0.5<br>(n=2)        | 0<br>(n=2)           | 1<br>(n=1)        | 0<br>(n=1)     | 0.5<br>(n=2)     | 0<br>(n=2)         |              |                |                |
| NO <sub>3</sub> / NH <sub>4</sub>                   | 0.5<br>(n=2)    | -1<br>(n=1)      | 0<br>(n=1)          | 0<br>(n=2)           | 0<br>(n=1)        | -1<br>(n=1)    |                  |                    |              |                |                |
| NO <sub>3</sub> / NH <sub>4</sub> / PO <sub>4</sub> | 0.25<br>(n=4)   | 1<br>(n=1)       | 1<br>(n=1)          |                      |                   |                |                  |                    | -1<br>(n=1)  |                | -1<br>(n=2)    |

Supplementary

Table S2: Summary of the carbon, nitrogen and phosphorus content and carbon-to-nitrogen, carbon-to-phosphorus and nitrogen-to-phosphorus ratios under different nutrient enrichment condition.

| Nutrient enrichment | Partner         | Study                  | Context                  | Coral species                 | Concentration    | Carbon content ( $\mu\text{g cm}^{-2}$ ) | Nitrogen content ( $\mu\text{g cm}^{-2}$ ) | Phosphorus content ( $\mu\text{g cm}^{-2}$ ) | C:N (atomic)    | C:P (atomic) | N:P (atomic)   |
|---------------------|-----------------|------------------------|--------------------------|-------------------------------|------------------|------------------------------------------|--------------------------------------------|----------------------------------------------|-----------------|--------------|----------------|
| Control             | Coral holobiont | Meyer & Shultz 1985    | In situ (fish excretion) | <i>Acropora palmata</i>       |                  |                                          | 208 $\pm$ 30                               | 31 $\pm$ 4                                   |                 |              | 21.8 $\pm$ 0.7 |
|                     |                 |                        |                          | <i>Porites furcata</i>        |                  |                                          | 451 $\pm$ 0.12                             | 44 $\pm$ 2                                   |                 |              | 26.3 $\pm$ 0.7 |
|                     |                 | Tanaka et al 2010      | Exp                      | <i>Montipora digitata</i>     |                  | 3432 $\pm$ 540                           | 392 $\pm$ 42                               | 26.4 $\pm$ 2.5                               | 10.2            | 336          | 33             |
|                     |                 | Cox and Ward 2002      | Exp                      | <i>Montipora capitata</i>     |                  | 40.8 $\pm$ 10.9 (%)                      | 4.1 $\pm$ 0.23 (%)                         |                                              |                 |              |                |
|                     |                 | Stambler et al 1991    | Exp                      | <i>Stylophora pistillata</i>  |                  |                                          |                                            |                                              | 6.1             | 233          | 38             |
|                     | Animal tissue   | Muscatine et al. 1989  | Exp                      | <i>Stylophora pistillata</i>  |                  | 704.7 $\pm$ 52.8                         | 112.7 $\pm$ 5.9                            |                                              | 7.31 $\pm$ 0.16 |              |                |
|                     |                 | Tanaka et al 2007      | Exp                      | <i>Stylophora pistillata</i>  |                  | 4116 $\pm$ 348                           | 644 $\pm$ 56                               |                                              | 7.4 $\pm$ 0.1   |              |                |
|                     |                 | Godinot et al. 2011    | Exp                      | <i>Stylophora pistillata</i>  |                  | 824.4 $\pm$ 34.8                         | 145.6 $\pm$ 9.8                            | 4.9 $\pm$ 0.7                                | 6.6             | 432.1        | 65.4           |
|                     |                 | McCauley & Goulet 2019 | Exp                      | <i>Pseudoplexura porosa</i>   |                  |                                          |                                            |                                              | 6.8             |              |                |
|                     |                 |                        |                          | <i>Eunicea tourneforti</i>    |                  |                                          |                                            |                                              | 4               |              |                |
|                     |                 | Tanaka 2017            | Exp                      | <i>Montipora digitata</i>     |                  | 396                                      |                                            |                                              | 7.9             |              |                |
|                     |                 |                        |                          | <i>Porites cylindrica</i>     |                  | 600                                      |                                            |                                              | 6.9             |              |                |
|                     | Symbiont        | Muscatine et al. 1989  | Exp                      | <i>Stylophora pistillata</i>  |                  | 204 $\pm$ 46.8                           | 29.9 $\pm$ 6.4                             |                                              | 7.7 $\pm$ 0.7   |              |                |
|                     |                 | Snidvong & Kinzie 1994 | Exp                      | <i>Pocillopora damicornis</i> |                  | 307 (pg.cell <sup>-1</sup> )             | 33 (pg.cell <sup>-1</sup> )                | 2.2 (pg.cell <sup>-1</sup> )                 | 11              | 360          | 33             |
|                     |                 | Tanaka et al 2007      | Exp                      | <i>Stylophora pistillata</i>  |                  | 312 $\pm$ 24                             | 49 $\pm$ 5.6                               |                                              | 7.5 $\pm$ 0.3   |              |                |
|                     |                 | Godinot et al. 2011    | Exp                      | <i>Stylophora pistillata</i>  |                  | 343.2 $\pm$ 22.8                         | 63 $\pm$ 9.8                               | 1.6 $\pm$ 0.09                               | 6.4             | 550.0        | 86.5           |
|                     |                 | McCauley & Goulet 2019 | Exp                      | <i>Pseudoplexura porosa</i>   |                  |                                          |                                            |                                              | 11.9            |              |                |
|                     |                 |                        |                          | <i>Eunicea tourneforti</i>    |                  |                                          |                                            |                                              | 10.3            |              |                |
|                     |                 | Tanaka 2017            | Exp                      | <i>Montipora digitata</i>     |                  | 132                                      |                                            |                                              | 7.9             |              |                |
|                     |                 |                        |                          | <i>Porites cylindrica</i>     |                  | 309                                      |                                            |                                              | 6.6             |              |                |
| NO <sub>3</sub>     | Host            | Tanaka 2017            | Exp                      | <i>Montipora digitata</i>     |                  | 360                                      |                                            |                                              | 7.2             |              |                |
|                     |                 |                        |                          | <i>Porites cylindrica</i>     |                  | 600                                      |                                            |                                              | 6.7             |              |                |
|                     | Symbiont        | Tanaka 2017            | Exp                      | <i>Montipora digitata</i>     |                  | 132                                      |                                            |                                              | 5.2             |              |                |
|                     |                 |                        |                          | <i>Porites cylindrica</i>     |                  | 309                                      |                                            |                                              | 5.9             |              |                |
| NH <sub>4</sub>     | Coral holobiont | Cox and Ward 2002      | Exp                      | <i>Montipora capitata</i>     | 20 $\mu\text{M}$ | 48.8 $\pm$ 11.9 (%)                      | 5.7 $\pm$ 0.87 (%)                         |                                              |                 |              |                |

Supplementary

|                                   |                 |                        |     |                               |                              |                              |                             |                              |             |       |      |
|-----------------------------------|-----------------|------------------------|-----|-------------------------------|------------------------------|------------------------------|-----------------------------|------------------------------|-------------|-------|------|
|                                   | Animal tissue   | McCauley & Goulet 2019 | Exp | <i>Pseudopleaxura porosa</i>  | 10 µM                        |                              |                             |                              | 7           |       |      |
|                                   |                 |                        |     | <i>Eunicea tourneforti</i>    | 10 µM                        |                              |                             |                              | 5.8         |       |      |
|                                   |                 | Muscatine et al. 1989  | Exp | <i>Stylophora pistillata</i>  | 20 µM                        | 766 ± 118.2                  | 152.2 ± 3.4                 |                              | 5.88 ± 0.78 |       |      |
|                                   |                 | McCauley & Goulet 2019 | Exp | <i>Pseudopleaxura porosa</i>  | 50 µM                        |                              |                             |                              | 6.7         |       |      |
|                                   | Symbiont        |                        |     | <i>Eunicea tourneforti</i>    | 50 µM                        |                              |                             |                              | 5.3         |       |      |
|                                   |                 | McCauley & Goulet 2019 | Exp | <i>Pseudopleaxura porosa</i>  | 10 µM                        |                              |                             |                              | 11.6        |       |      |
|                                   |                 |                        |     | <i>Eunicea tourneforti</i>    | 10 µM                        |                              |                             |                              | 10.7        |       |      |
|                                   |                 | Snidvong & Kinzie 1994 | Exp | <i>Pocillopora damicornis</i> | 15 µM                        | 311 (pg.cell <sup>-1</sup> ) | 70 (pg.cell <sup>-1</sup> ) | 1.3 (pg.cell <sup>-1</sup> ) | 5           | 618   | 119  |
| PO <sub>4</sub>                   | Coral holobiont | Stambler et al 1991    | Exp | <i>Stylophora pistillata</i>  | 0.5 µM                       |                              |                             |                              | 5.8         | 416   | 71   |
|                                   |                 |                        |     |                               | 2 µM                         |                              |                             |                              | 5.1         | 375   | 73   |
|                                   | Animal tissue   | Muscatine et al. 1989  | Exp | <i>Stylophora pistillata</i>  | 2 µM                         | 493.1 ± 141.2                | 86.2 ± 0.8                  |                              | 6.69 ± 1.86 |       |      |
|                                   |                 | Godinot et al. 2011    | Exp | <i>Stylophora pistillata</i>  | 0.5 µM                       | 744 ± 31.2                   | 135.8 ± 4.2                 | 4.6 ± 0.4                    | 6.4         | 416.1 | 65.1 |
|                                   |                 |                        |     |                               | 2.5 µM                       | 782.4 ± 42                   | 134.4 ± 8.4                 | 5.2 ± 0.8                    | 6.8         | 388.1 | 57.1 |
|                                   |                 | McCauley & Goulet 2019 | Exp | <i>Pseudopleaxura porosa</i>  | 4 µM                         |                              |                             |                              | 5.8         |       |      |
|                                   |                 |                        |     | <i>Eunicea tourneforti</i>    | 4 µM                         |                              |                             |                              | 5.4         |       |      |
|                                   | Symbiont        | Muscatine et al. 1989  | Exp | <i>Stylophora pistillata</i>  | 2 µM                         | 207.1 ± 39.9                 | 33.4                        |                              | 6.3         |       |      |
|                                   |                 | Snidvong & Kinzie 1994 | Exp | <i>Pocillopora damicornis</i> | 1.2 µM                       | 235 (pg.cell <sup>-1</sup> ) | 27 (pg.cell <sup>-1</sup> ) | 1.2 (pg.cell <sup>-1</sup> ) | 10          | 505   | 50   |
|                                   |                 |                        |     |                               |                              |                              |                             |                              |             |       |      |
|                                   |                 | Godinot et al. 2011    | Exp | <i>Stylophora pistillata</i>  | 0.5 µM                       | 398.4 ± 34.8                 | 65.8 ± 15.4                 | 2 ± 0.09                     | 7.1         | 518.8 | 73.4 |
|                                   |                 |                        |     |                               | 2.5 µM                       | 490.8 ± 79.2                 | 78.4 ± 12.6                 | 3.1 ± 0.16                   | 7.3         | 409.0 | 56.0 |
|                                   |                 | McCauley & Goulet 2019 | Exp | <i>Pseudopleaxura porosa</i>  | 4 µM                         |                              |                             |                              | 13.1        |       |      |
|                                   |                 |                        | Exp | <i>Eunicea tourneforti</i>    | 4 µM                         |                              |                             |                              | 9.1         |       |      |
| NO <sub>3</sub> / PO <sub>4</sub> | Coral holobiont | Tanaka et al 2010      | Exp | <i>Montipora digitata</i>     | 10.4 µM<br>0.49 µM<br>N:P 21 | 3108 ± 252                   | 420 ± 14                    | 28.5 ± 1.2                   | 8.6         | 282   | 33   |

|                                   |               |                   |                  |                              |                    |            |           |  |           |  |  |
|-----------------------------------|---------------|-------------------|------------------|------------------------------|--------------------|------------|-----------|--|-----------|--|--|
| NO <sub>3</sub> / PO <sub>4</sub> | Animal tissue | Tanaka et al 2007 | Exp<br>(5 days)  | <i>Stylophora pistillata</i> | 5 µM               | 5940 ± 480 | 882 ± 84  |  | 7.9 ± 0.1 |  |  |
|                                   |               |                   | Exp<br>(10 days) | <i>Stylophora pistillata</i> | 0.3 µM<br>N:P : 16 | 7056 ± 672 | 1008 ± 98 |  | 8.1 ± 0.1 |  |  |
|                                   |               | Tanaka 2017       | Exp              | <i>Montipora digitata</i>    |                    | 456        |           |  | 7.1       |  |  |

Supplementary

|                                   |                 |                        |                             |                               |                                                                                                    |                                 |                                |                                 |             |     |            |
|-----------------------------------|-----------------|------------------------|-----------------------------|-------------------------------|----------------------------------------------------------------------------------------------------|---------------------------------|--------------------------------|---------------------------------|-------------|-----|------------|
|                                   |                 |                        |                             | <i>Porites cylindrica</i>     |                                                                                                    | 657                             |                                |                                 | 6.6         |     |            |
|                                   | Symbiont        | Tanaka et al 2007      | Exp<br>(5 days)             | <i>Stylophora pistillata</i>  | N : 5 µM<br>P : 0.3 µM<br>N:P : 16                                                                 | 456 ± 36                        | 62 ± 5.6                       |                                 | 8.8 ± 0.3   |     |            |
|                                   |                 |                        | Exp<br>(10 days)            |                               |                                                                                                    | 624 ± 60                        | 84 ± 8.4                       |                                 | 8.7 ± 0.2   |     |            |
|                                   |                 | Tanaka 2017            | Exp                         | <i>Montipora digitata</i>     | N : 1.5 µM<br>P : 0.1 µM<br>N:P 15                                                                 | 192                             |                                |                                 | 6.4         |     |            |
|                                   |                 |                        |                             | <i>Porites cylindrica</i>     |                                                                                                    | 402                             |                                |                                 | 6.1         |     |            |
| NH <sub>4</sub> / PO <sub>4</sub> | Coral holobiont | Meyer & Shultz 1985    | In situ<br>(fish excretion) | <i>Acropora palmata</i>       | N : 2.4 mmol<br>m <sup>-2</sup> d <sup>-1</sup><br>P : 0.2 mmol<br>m <sup>-2</sup> d <sup>-1</sup> |                                 | 440 ± 50                       | 50 ± 5                          |             |     | 20.7 ± 2.1 |
|                                   |                 |                        |                             | <i>Porites furcata</i>        | N : 7.3 mmol<br>m <sup>-2</sup> d <sup>-1</sup><br>P : 0.1 mmol<br>m <sup>-2</sup> d <sup>-1</sup> |                                 | 564 ± 16                       | 48 ± 2                          |             |     | 24.4 ± 1   |
|                                   | Animal tissue   | Muscatine et al. 1989  | Exp                         | <i>Stylophora pistillata</i>  | N:P : 10                                                                                           | 844.2 ± 60.2                    | 172.4 ± 21.4                   |                                 | 5.80 ± 1.13 |     |            |
|                                   | Symbiont        | Muscatine et al. 1989  | Exp                         | <i>Stylophora pistillata</i>  | N:P : 10                                                                                           | 303.3 ± 15.8                    | 74.6 ± 0.9                     |                                 | 4.7 ± 0.2   |     |            |
|                                   |                 | Snidvong & Kinzie 1994 | Exp                         | <i>Pocillopora damicornis</i> | N:P 12.5                                                                                           | 184<br>(pg.cell <sup>-1</sup> ) | 42<br>(pg.cell <sup>-1</sup> ) | 0.9<br>(pg.cell <sup>-1</sup> ) | 5           | 528 | 103        |

## II Results

Table S3: Summary of the median and standard error (SE) for each parameter in *Turbinaria reniformis* (a.) and *Sarcophyton glaucum* (b.)

a. *Turbinaria reniformis*

|                                                                                          | Control balanced<br>DIN:DIP <sub>2.5</sub> |       | Balanced<br>DIN:DIP <sub>3</sub> |       | Imbalanced<br>DIN:DIP <sub>0.5</sub> |       | Imbalanced<br>DIN:DIP <sub>15</sub> |       |
|------------------------------------------------------------------------------------------|--------------------------------------------|-------|----------------------------------|-------|--------------------------------------|-------|-------------------------------------|-------|
|                                                                                          | Median                                     | ± SE  | Median                           | ± SE  | Median                               | ± SE  | Median                              | ± SE  |
| Nitrate uptake<br>(nmole NO <sub>3</sub> .min <sup>-1</sup> .g <sup>-1</sup><br>AFDW)    | 7.35                                       | 3.66  | 108.84                           | 12.61 | 12.60                                | 2.98  | 56.55                               | 8.71  |
| Phosphorus uptake<br>(nmole PO <sub>4</sub> .min <sup>-1</sup> .g <sup>-1</sup><br>AFDW) | 3.17                                       | 1.41  | 70.39                            | 7.77  | 62.79                                | 11.41 | 13.19                               | 6.48  |
| Total chlorophyll a and c2<br>(mg.g <sup>-1</sup> AFDW)                                  | 0.21                                       | 0.024 | 0.38                             | 0.054 | 0.21                                 | 0.046 | 0.30                                | 0.049 |
| Net photosynthetic rates<br>(mmol.h <sup>-1</sup> .g <sup>-1</sup> AFDW)                 | 0.06                                       | 0.007 | 0.14                             | 0.016 | 0.09                                 | 0.018 | 0.09                                | 0.007 |
| Respiration rates<br>(mmol.h <sup>-1</sup> .g <sup>-1</sup> AFDW)                        | -0.13                                      | 0.01  | -0.16                            | 0.01  | -0.16                                | 0.03  | -0.21                               | 0.02  |
| Yield                                                                                    | 0.50                                       | 0.01  | 0.49                             | 0.02  | 0.51                                 | 0.01  | 0.45                                | 0.01  |
| Holobiont carbohydrate<br>content<br>(mg.g <sup>-1</sup> AFDW)                           | 1.61                                       | 0.18  | 3.19                             | 0.41  | 3.42                                 | 0.41  | 2.89                                | 0.31  |
| Holobiont lipid content<br>(mg.g <sup>-1</sup> AFDW)                                     | 9.70                                       | 0.51  | 18.90                            | 3.74  | 8.82                                 | 2.55  | 14.13                               | 1.18  |
| Carbon<br>(mg.g <sup>-1</sup> AFDW)                                                      | 24.07                                      | 2.44  | 39.29                            | 5.85  | 47.19                                | 2.98  | 35.35                               | 1.10  |
| Nitrogen<br>(mg.g <sup>-1</sup> AFDW)                                                    | 3.77                                       | 0.60  | 5.95                             | 1.00  | 7.78                                 | 0.41  | 6.40                                | 0.23  |
| Phosphorous<br>(mg.g <sup>-1</sup> AFDW)                                                 | 0.16                                       | 0.08  | 0.12                             | 0.01  | 0.24                                 | 0.13  | 0.11                                | 0.004 |
| C:N<br>(mass)                                                                            | 6.39                                       | 0.67  | 6.60                             | 0.13  | 6.15                                 | 0.19  | 5.52                                | 0.10  |
| C:P<br>(mass)                                                                            | 161.96                                     | 49.69 | 325.66                           | 11.56 | 218.71                               | 57.54 | 318.33                              | 18.75 |
| N:P<br>(mass)                                                                            | 20.36                                      | 7.90  | 49.31                            | 2.72  | 35.61                                | 10.16 | 59.35                               | 2.74  |
| Dinoflagellate density<br>(x10 <sup>6</sup> cells.g <sup>-1</sup> AFDW)                  | 425.88                                     | 42.12 | 258.50                           | 25.06 | 135.83                               | 46.25 | 317.84                              | 19.87 |
| Holobiont protein content<br>(mg.g <sup>-1</sup> AFDW)                                   | 94.24                                      | 3.54  | 102.50                           | 3.02  | 79.32                                | 8.70  | 100.29                              | 4.57  |

b. *Sarcophyton glaucum*

|                                                                                          | Control balanced<br>DIN:DIP <sub>2.5</sub> |       | Balanced<br>DIN:DIP <sub>3</sub> |        | Imbalanced<br>DIN:DIP <sub>0.5</sub> |        | Imbalanced<br>DIN:DIP <sub>15</sub> |       |
|------------------------------------------------------------------------------------------|--------------------------------------------|-------|----------------------------------|--------|--------------------------------------|--------|-------------------------------------|-------|
|                                                                                          | Median                                     | ± SE  | Median                           | ± SE   | Median                               | ± SE   | Median                              | ± SE  |
| Nitrate uptake<br>(nmole NO <sub>3</sub> .min <sup>-1</sup> .g <sup>-1</sup><br>AFDW)    | 10.49                                      | 4.65  | 24.38                            | 4.02   | 4.33                                 | 1.28   | 12.44                               | 2.02  |
| Phosphorus uptake<br>(nmole PO <sub>4</sub> .min <sup>-1</sup> .g <sup>-1</sup><br>AFDW) | 7.67                                       | 1.94  | 9.52                             | 3.76   | 21.24                                | 3.01   | 5.95                                | 1.11  |
| Total chlorophyll a and c2<br>(mg.g <sup>-1</sup> AFDW)                                  | 0.22                                       | 0.04  | 0.32                             | 0.07   | 0.20                                 | 0.05   | 0.30                                | 0.08  |
| Net photosynthetic rates<br>(mmol.h <sup>-1</sup> .g <sup>-1</sup> AFDW)                 | 0.02                                       | 0.002 | 0.01                             | 0.005  | 0.02                                 | 0.002  | 0.01                                | 0.003 |
| Respiration rates<br>(mmol.h <sup>-1</sup> .g <sup>-1</sup> AFDW)                        | -0.03                                      | 0.003 | -0.02                            | 0.004  | -0.02                                | 0.001  | -0.02                               | 0.003 |
| Yield                                                                                    | 0.51                                       | 0.02  | 0.63                             | 0.02   | 0.46                                 | 0.02   | 0.59                                | 0.02  |
| Holobiont carbohydrate<br>content<br>(mg.g <sup>-1</sup> AFDW)                           | 2.22                                       | 0.06  | 2.22                             | 0.08   | 2.75                                 | 0.17   | 1.05                                | 0.26  |
| Holobiont lipid content<br>(mg.g <sup>-1</sup> AFDW)                                     | 446.93                                     | 50.01 | 474.39                           | 36.65  | 389.04                               | 46.10  | 355.07                              | 76.07 |
| Carbon<br>(mg.g <sup>-1</sup> AFDW)                                                      | 210.51                                     | 5.64  | 191.34                           | 28.29  | 194.49                               | 23.46  | 218.67                              | 5.37  |
| Nitrogen<br>(mg.g <sup>-1</sup> AFDW)                                                    | 17.14                                      | 0.45  | 12.08                            | 3.92   | 17.06                                | 1.79   | 17.68                               | 2.15  |
| Phosphorous<br>(mg.g <sup>-1</sup> AFDW)                                                 | 0.22                                       | 0.01  | 0.24                             | 0.11   | 0.21                                 | 0.01   | 0.23                                | 0.01  |
| C:N<br>(mass)                                                                            | 12.15                                      | 0.09  | 16.16                            | 1.79   | 13.09                                | 1.91   | 12.15                               | 1.40  |
| C:P<br>(mass)                                                                            | 918.89                                     | 36.50 | 848.54                           | 228.29 | 973.19                               | 122.93 | 964.33                              | 52.22 |
| N:P<br>(mass)                                                                            | 75.78                                      | 2.45  | 50.80                            | 9.51   | 78.46                                | 7.30   | 78.43                               | 5.26  |
| Dinoflagellate density<br>(x10 <sup>6</sup> cells.g <sup>-1</sup> AFDW)                  | 314.18                                     | 16.30 | 294.76                           | 10.69  | 292.96                               | 18.03  | 361.03                              | 24.55 |
| Holobiont protein content<br>(mg.g <sup>-1</sup> AFDW)                                   | 36.78                                      | 2.27  | 39.00                            | 8.72   | 69.23                                | 10.23  | 26.63                               | 6.36  |

Table S4: Summary of the statistical outcomes of the different measurements done on *Sarcophyton glaucum* and *Turbinaria reniformis*

## a. Nutrient uptake rates

| Nitrate uptake per AFDW                           |          |        |         |         |               |                                                   |          |                            |         |                         |                                                             |         |  |
|---------------------------------------------------|----------|--------|---------|---------|---------------|---------------------------------------------------|----------|----------------------------|---------|-------------------------|-------------------------------------------------------------|---------|--|
| Sarcophyton glaucum                               |          |        |         |         |               | Turbinaria reniformis                             |          |                            |         |                         | Comparaison S. glaucum vs T.reniformis in control condition |         |  |
|                                                   | Df       | Sum Sq | Mean Sq | F value | P value       |                                                   | Df       | Kruskal-Wallis Chi-squared | P value | Welch two sample t-test |                                                             |         |  |
| Condition                                         | 3        | 989.02 | 329.67  | 7.10    | 0.003         | Condition                                         | 3        | 16.70                      | 0.001   | t                       | df                                                          | p-value |  |
| Residuals                                         | 15       | 696.82 | 46.45   |         |               |                                                   |          |                            |         | 0.44                    | 5                                                           | 0.68    |  |
|                                                   | Estimate | SE     | Df      | t.ratio | P value (fdr) |                                                   | Estimate | SE                         | Df      | t.ratio                 | P value (fdr)                                               |         |  |
| Control - NO <sub>3</sub>                         | -0.3     | 4.6    | 15      | -0.06   | 0.95          | Control - NO <sub>3</sub>                         | -48.1    | 13.8                       | 16      | -3.48                   | 0.005                                                       |         |  |
| Control - NO <sub>3</sub> PO <sub>4</sub>         | -13.4    | 4.6    | 15      | -2.93   | 0.02          | Control - NO <sub>3</sub> PO <sub>4</sub>         | -107.3   | 13.8                       | 16      | -7.77                   | < 0.001                                                     |         |  |
| Control - PO <sub>4</sub>                         | 5.8      | 4.6    | 15      | 1.28    | 0.26          | Control - PO <sub>4</sub>                         | -4.5     | 15.1                       | 16      | -0.30                   | 0.77                                                        |         |  |
| NO <sub>3</sub> - NO <sub>3</sub> PO <sub>4</sub> | -13.1    | 4.3    | 15      | -3.04   | 0.02          | NO <sub>3</sub> - NO <sub>3</sub> PO <sub>4</sub> | -59.2    | 12.3                       | 16      | -4.80                   | 0.00                                                        |         |  |
| NO <sub>3</sub> PO <sub>4</sub> - PO <sub>4</sub> | 19.3     | 4.3    | 15      | 4.47    | 0.003         | NO <sub>3</sub> PO <sub>4</sub> - PO <sub>4</sub> | 102.8    | 13.8                       | 16      | 7.45                    | < 0.001                                                     |         |  |
| NO <sub>3</sub> - PO <sub>4</sub>                 | 6.1      | 4.3    | 15      | 1.42    | 0.26          | NO <sub>3</sub> - PO <sub>4</sub>                 | 43.6     | 13.8                       | 16      | 3.16                    | 0.01                                                        |         |  |

| Phosphate uptake per AFDW                         |          |        |         |         |               |                                                   |          |         |         |         |                                                             |                         |      |         |
|---------------------------------------------------|----------|--------|---------|---------|---------------|---------------------------------------------------|----------|---------|---------|---------|-------------------------------------------------------------|-------------------------|------|---------|
| Sarcophyton glaucum                               |          |        |         |         |               | Turbinaria reniformis                             |          |         |         |         | Comparaison S. glaucum vs T.reniformis in control condition |                         |      |         |
|                                                   | Df       | Sum Sq | Mean Sq | F value | P value       |                                                   | Df       | Sum Sq  | Mean Sq | F value | P value                                                     | Welch two sample t-test |      |         |
| Condition                                         | 3        | 491.38 | 163.794 | 4.0547  | 0.024         | Condition                                         | 3        | 18563.4 | 6187.8  | 15.9    | < 0.001                                                     | t                       | df   | p-value |
| Residuals                                         | 17       | 686.73 | 40.396  |         |               | Residuals                                         | 18       | 7001.7  | 389     |         |                                                             | 1.45                    | 5.48 | 0.20    |
|                                                   | Estimate | SE     | Df      | t.ratio | P value (fdr) |                                                   | Estimate | SE      | Df      | t.ratio | P value (fdr)                                               |                         |      |         |
| Control - NO <sub>3</sub>                         | 1.6      | 4.1    | 17      | 0.40    | 0.98          | Control - NO <sub>3</sub>                         | -11.9    | 12.7    | 18      | -0.94   | 0.79                                                        |                         |      |         |
| Control - NO <sub>3</sub> PO <sub>4</sub>         | -6.1     | 4.1    | 17      | -1.49   | 0.46          | Control - NO <sub>3</sub> PO <sub>4</sub>         | -71.0    | 12.7    | 18      | -5.58   | < 0.001                                                     |                         |      |         |
| Control - PO <sub>4</sub>                         | -10.5    | 4.3    | 17      | -2.46   | 0.10          | Control - PO <sub>4</sub>                         | -57.0    | 12.7    | 18      | -4.47   | 0.001                                                       |                         |      |         |
| NO <sub>3</sub> - NO <sub>3</sub> PO <sub>4</sub> | -7.7     | 3.7    | 17      | -2.11   | 0.19          | NO <sub>3</sub> - NO <sub>3</sub> PO <sub>4</sub> | -59.1    | 12.7    | 18      | -5.19   | < 0.001                                                     |                         |      |         |
| NO <sub>3</sub> PO <sub>4</sub> - PO <sub>4</sub> | -4.4     | 3.9    | 17      | -1.14   | 0.67          | NO <sub>3</sub> PO <sub>4</sub> - PO <sub>4</sub> | -14.1    | 12.7    | 18      | 1.24    | 0.61                                                        |                         |      |         |
| NO <sub>3</sub> - PO <sub>4</sub>                 | -12.1    | 3.9    | 17      | -3.15   | 0.03          | NO <sub>3</sub> - PO <sub>4</sub>                 | -45.1    | 12.7    | 18      | -3.96   | 0.01                                                        |                         |      |         |

# Supplementary

## b. Physiological parameters

### Chlorophyll a and c<sub>2</sub> content per Ash free Dry Weight

| <i>Sarcophyton glaucum</i> |    |        |         |         |         | <i>Turbinaria reniformis</i> |    |        |         |         |         | <i>Comparison S. glaucum vs T.reniformis in control condition</i> |    |         |
|----------------------------|----|--------|---------|---------|---------|------------------------------|----|--------|---------|---------|---------|-------------------------------------------------------------------|----|---------|
|                            | Df | Sum Sq | Mean Sq | F value | P value |                              | Df | Sum Sq | Mean Sq | F value | P value | Welch two sample t-test                                           |    |         |
| Condition                  | 3  | 0.19   | 0.06    | 2.90    | 0.06    | Condition                    | 3  | 0.15   | 0.05    | 4.40    | 0.02    | t                                                                 | df | p-value |
| Residuals                  | 20 | 0.45   | 0.02    |         |         | Residuals                    | 19 | 0.22   | 0.01    |         |         | -0.37                                                             | 8  | 0.72    |
|                            |    |        |         |         |         |                              |    |        |         |         |         |                                                                   |    |         |
|                            |    |        |         |         |         |                              |    |        |         |         |         |                                                                   |    |         |
|                            |    |        |         |         |         |                              |    |        |         |         |         |                                                                   |    |         |
|                            |    |        |         |         |         |                              |    |        |         |         |         |                                                                   |    |         |
|                            |    |        |         |         |         |                              |    |        |         |         |         |                                                                   |    |         |
|                            |    |        |         |         |         |                              |    |        |         |         |         |                                                                   |    |         |
|                            |    |        |         |         |         |                              |    |        |         |         |         |                                                                   |    |         |
|                            |    |        |         |         |         |                              |    |        |         |         |         |                                                                   |    |         |
|                            |    |        |         |         |         |                              |    |        |         |         |         |                                                                   |    |         |
|                            |    |        |         |         |         |                              |    |        |         |         |         |                                                                   |    |         |
|                            |    |        |         |         |         |                              |    |        |         |         |         |                                                                   |    |         |
|                            |    |        |         |         |         |                              |    |        |         |         |         |                                                                   |    |         |
|                            |    |        |         |         |         |                              |    |        |         |         |         |                                                                   |    |         |
|                            |    |        |         |         |         |                              |    |        |         |         |         |                                                                   |    |         |
|                            |    |        |         |         |         |                              |    |        |         |         |         |                                                                   |    |         |
|                            |    |        |         |         |         |                              |    |        |         |         |         |                                                                   |    |         |
|                            |    |        |         |         |         |                              |    |        |         |         |         |                                                                   |    |         |
|                            |    |        |         |         |         |                              |    |        |         |         |         |                                                                   |    |         |
|                            |    |        |         |         |         |                              |    |        |         |         |         |                                                                   |    |         |
|                            |    |        |         |         |         |                              |    |        |         |         |         |                                                                   |    |         |
|                            |    |        |         |         |         |                              |    |        |         |         |         |                                                                   |    |         |
|                            |    |        |         |         |         |                              |    |        |         |         |         |                                                                   |    |         |
|                            |    |        |         |         |         |                              |    |        |         |         |         |                                                                   |    |         |
|                            |    |        |         |         |         |                              |    |        |         |         |         |                                                                   |    |         |
|                            |    |        |         |         |         |                              |    |        |         |         |         |                                                                   |    |         |
|                            |    |        |         |         |         |                              |    |        |         |         |         |                                                                   |    |         |
|                            |    |        |         |         |         |                              |    |        |         |         |         |                                                                   |    |         |
|                            |    |        |         |         |         |                              |    |        |         |         |         |                                                                   |    |         |
|                            |    |        |         |         |         |                              |    |        |         |         |         |                                                                   |    |         |
|                            |    |        |         |         |         |                              |    |        |         |         |         |                                                                   |    |         |
|                            |    |        |         |         |         |                              |    |        |         |         |         |                                                                   |    |         |
|                            |    |        |         |         |         |                              |    |        |         |         |         |                                                                   |    |         |
|                            |    |        |         |         |         |                              |    |        |         |         |         |                                                                   |    |         |
|                            |    |        |         |         |         |                              |    |        |         |         |         |                                                                   |    |         |
|                            |    |        |         |         |         |                              |    |        |         |         |         |                                                                   |    |         |
|                            |    |        |         |         |         |                              |    |        |         |         |         |                                                                   |    |         |
|                            |    |        |         |         |         |                              |    |        |         |         |         |                                                                   |    |         |
|                            |    |        |         |         |         |                              |    |        |         |         |         |                                                                   |    |         |
|                            |    |        |         |         |         |                              |    |        |         |         |         |                                                                   |    |         |
|                            |    |        |         |         |         |                              |    |        |         |         |         |                                                                   |    |         |
|                            |    |        |         |         |         |                              |    |        |         |         |         |                                                                   |    |         |
|                            |    |        |         |         |         |                              |    |        |         |         |         |                                                                   |    |         |
|                            |    |        |         |         |         |                              |    |        |         |         |         |                                                                   |    |         |
|                            |    |        |         |         |         |                              |    |        |         |         |         |                                                                   |    |         |
|                            |    |        |         |         |         |                              |    |        |         |         |         |                                                                   |    |         |
|                            |    |        |         |         |         |                              |    |        |         |         |         |                                                                   |    |         |
|                            |    |        |         |         |         |                              |    |        |         |         |         |                                                                   |    |         |
|                            |    |        |         |         |         |                              |    |        |         |         |         |                                                                   |    |         |
|                            |    |        |         |         |         |                              |    |        |         |         |         |                                                                   |    |         |
|                            |    |        |         |         |         |                              |    |        |         |         |         |                                                                   |    |         |
|                            |    |        |         |         |         |                              |    |        |         |         |         |                                                                   |    |         |
|                            |    |        |         |         |         |                              |    |        |         |         |         |                                                                   |    |         |
|                            |    |        |         |         |         |                              |    |        |         |         |         |                                                                   |    |         |
|                            |    |        |         |         |         |                              |    |        |         |         |         |                                                                   |    |         |
|                            |    |        |         |         |         |                              |    |        |         |         |         |                                                                   |    |         |
|                            |    |        |         |         |         |                              |    |        |         |         |         |                                                                   |    |         |
|                            |    |        |         |         |         |                              |    |        |         |         |         |                                                                   |    |         |
|                            |    |        |         |         |         |                              |    |        |         |         |         |                                                                   |    |         |
|                            |    |        |         |         |         |                              |    |        |         |         |         |                                                                   |    |         |
|                            |    |        |         |         |         |                              |    |        |         |         |         |                                                                   |    |         |
|                            |    |        |         |         |         |                              |    |        |         |         |         |                                                                   |    |         |
|                            |    |        |         |         |         |                              |    |        |         |         |         |                                                                   |    |         |
|                            |    |        |         |         |         |                              |    |        |         |         |         |                                                                   |    |         |
|                            |    |        |         |         |         |                              |    |        |         |         |         |                                                                   |    |         |
|                            |    |        |         |         |         |                              |    |        |         |         |         |                                                                   |    |         |
|                            |    |        |         |         |         |                              |    |        |         |         |         |                                                                   |    |         |
|                            |    |        |         |         |         |                              |    |        |         |         |         |                                                                   |    |         |
|                            |    |        |         |         |         |                              |    |        |         |         |         |                                                                   |    |         |
|                            |    |        |         |         |         |                              |    |        |         |         |         |                                                                   |    |         |
|                            |    |        |         |         |         |                              |    |        |         |         |         |                                                                   |    |         |
|                            |    |        |         |         |         |                              |    |        |         |         |         |                                                                   |    |         |
|                            |    |        |         |         |         |                              |    |        |         |         |         |                                                                   |    |         |
|                            |    |        |         |         |         |                              |    |        |         |         |         |                                                                   |    |         |
|                            |    |        |         |         |         |                              |    |        |         |         |         |                                                                   |    |         |
|                            |    |        |         |         |         |                              |    |        |         |         |         |                                                                   |    |         |
|                            |    |        |         |         |         |                              |    |        |         |         |         |                                                                   |    |         |
|                            |    |        |         |         |         |                              |    |        |         |         |         |                                                                   |    |         |
|                            |    |        |         |         |         |                              |    |        |         |         |         |                                                                   |    |         |
|                            |    |        |         |         |         |                              |    |        |         |         |         |                                                                   |    |         |
|                            |    |        |         |         |         |                              |    |        |         |         |         |                                                                   |    |         |
|                            |    |        |         |         |         |                              |    |        |         |         |         |                                                                   |    |         |
|                            |    |        |         |         |         |                              |    |        |         |         |         |                                                                   |    |         |
|                            |    |        |         |         |         |                              |    |        |         |         |         |                                                                   |    |         |
|                            |    |        |         |         |         |                              |    |        |         |         |         |                                                                   |    |         |
|                            |    |        |         |         |         |                              |    |        |         |         |         |                                                                   |    |         |
|                            |    |        |         |         |         |                              |    |        |         |         |         |                                                                   |    |         |
|                            |    |        |         |         |         |                              |    |        |         |         |         |                                                                   |    |         |
|                            |    |        |         |         |         |                              |    |        |         |         |         |                                                                   |    |         |
|                            |    |        |         |         |         |                              |    |        |         |         |         |                                                                   |    |         |
|                            |    |        |         |         |         |                              |    |        |         |         |         |                                                                   |    |         |
|                            |    |        |         |         |         |                              |    |        |         |         |         |                                                                   |    |         |
|                            |    |        |         |         |         |                              |    |        |         |         |         |                                                                   |    |         |
|                            |    |        |         |         |         |                              |    |        |         |         |         |                                                                   |    |         |
|                            |    |        |         |         |         |                              |    |        |         |         |         |                                                                   |    |         |
|                            |    |        |         |         |         |                              |    |        |         |         |         |                                                                   |    |         |
|                            |    |        |         |         |         |                              |    |        |         |         |         |                                                                   |    |         |
|                            |    |        |         |         |         |                              |    |        |         |         |         |                                                                   |    |         |
|                            |    |        |         |         |         |                              |    |        |         |         |         |                                                                   |    |         |
|                            |    |        |         |         |         |                              |    |        |         |         |         |                                                                   |    |         |
|                            |    |        |         |         |         |                              |    |        |         |         |         |                                                                   |    |         |
|                            |    |        |         |         |         |                              |    |        |         |         |         |                                                                   |    |         |
|                            |    |        |         |         |         |                              |    |        |         |         |         |                                                                   |    |         |
|                            |    |        |         |         |         |                              |    |        |         |         |         |                                                                   |    |         |
|                            |    |        |         |         |         |                              |    |        |         |         |         |                                                                   |    |         |
|                            |    |        |         |         |         |                              |    |        |         |         |         |                                                                   |    |         |
|                            |    |        |         |         |         |                              |    |        |         |         |         |                                                                   |    |         |
|                            |    |        |         |         |         |                              |    |        |         |         |         |                                                                   |    |         |
|                            |    |        |         |         |         |                              |    |        |         |         |         |                                                                   |    |         |
|                            |    |        |         |         |         |                              |    |        |         |         |         |                                                                   |    |         |
|                            |    |        |         |         |         |                              |    |        |         |         |         |                                                                   |    |         |
|                            |    |        |         |         |         |                              |    |        |         |         |         |                                                                   |    |         |
|                            |    |        |         |         |         |                              |    |        |         |         |         |                                                                   |    |         |
|                            |    |        |         |         |         |                              |    |        |         |         |         |                                                                   |    |         |
|                            |    |        |         |         |         |                              |    |        |         |         |         |                                                                   |    |         |
|                            |    |        |         |         |         |                              |    |        |         |         |         |                                                                   |    |         |
|                            |    |        |         |         |         |                              |    |        |         |         |         |                                                                   |    |         |
|                            |    |        |         |         |         |                              |    |        |         |         |         |                                                                   |    |         |
|                            |    |        |         |         |         |                              |    |        |         |         |         |                                                                   |    |         |
|                            |    |        |         |         |         |                              |    |        |         |         |         |                                                                   |    |         |
|                            |    |        |         |         |         |                              |    |        |         |         |         |                                                                   |    |         |
|                            |    |        |         |         |         |                              |    |        |         |         |         |                                                                   |    |         |
|                            |    |        |         |         |         |                              |    |        |         |         |         |                                                                   |    |         |
|                            |    |        |         |         |         |                              |    |        |         |         |         |                                                                   |    |         |
|                            |    |        |         |         |         |                              |    |        |         |         |         |                                                                   |    |         |
|                            |    |        |         |         |         |                              |    |        |         |         |         |                                                                   |    |         |
|                            |    |        |         |         |         |                              |    |        |         |         |         |                                                                   |    |         |
|                            |    |        |         |         |         |                              |    |        |         |         |         |                                                                   |    |         |
|                            |    |        |         |         |         |                              |    |        |         |         |         |                                                                   |    |         |
|                            |    |        |         |         |         |                              |    |        |         |         |         |                                                                   |    |         |
|                            |    |        |         |         |         |                              |    |        |         |         |         |                                                                   |    |         |
|                            |    |        |         |         |         |                              |    |        |         |         |         |                                                                   |    |         |
|                            |    |        |         |         |         |                              |    |        |         |         |         |                                                                   |    |         |
|                            |    |        |         |         |         |                              |    |        |         |         |         |                                                                   |    |         |
|                            |    |        |         |         |         |                              |    |        |         |         |         |                                                                   |    |         |
|                            |    |        |         |         |         |                              |    |        |         |         |         |                                                                   |    |         |
|                            |    |        |         |         |         |                              |    |        |         |         |         |                                                                   |    |         |
|                            |    |        |         |         |         |                              |    |        |         |         |         |                                                                   |    |         |
|                            |    |        |         |         |         |                              |    |        |         |         |         |                                                                   |    |         |
|                            |    |        |         |         |         |                              |    |        |         |         |         |                                                                   |    |         |
|                            |    |        |         |         |         |                              |    |        |         |         |         |                                                                   |    |         |
|                            |    |        |         |         |         |                              |    |        |         |         |         |                                                                   |    |         |
|                            |    |        |         |         |         |                              |    |        |         |         |         |                                                                   |    |         |
|                            |    |        |         |         |         |                              |    |        |         |         |         |                                                                   |    |         |
|                            |    |        |         |         |         |                              |    |        |         |         |         |                                                                   |    |         |
|                            |    |        |         |         |         |                              |    |        |         |         |         |                                                                   |    |         |
|                            |    |        |         |         |         |                              |    |        |         |         |         |                                                                   |    |         |
|                            |    |        |         |         |         |                              |    |        |         |         |         |                                                                   |    |         |
|                            |    |        |         |         |         |                              |    |        |         |         |         |                                                                   |    |         |
|                            |    |        |         |         |         |                              |    |        |         |         |         |                                                                   |    |         |
|                            |    |        |         |         |         |                              |    |        |         |         |         |                                                                   |    |         |
|                            |    |        |         |         |         |                              |    |        |         |         |         |                                                                   |    |         |
|                            |    |        |         |         |         |                              |    |        |         |         |         |                                                                   |    |         |
|                            |    |        |         |         |         |                              |    |        |         |         |         |                                                                   |    |         |
|                            |    |        |         |         |         |                              |    |        |         |         |         |                                                                   |    |         |
|                            |    |        |         |         |         |                              |    |        |         |         |         |                                                                   |    |         |
|                            |    |        |         |         |         |                              |    |        |         |         |         |                                                                   |    |         |
|                            |    |        |         |         |         |                              |    |        |         |         |         |                                                                   |    |         |
|                            |    |        |         |         |         |                              |    |        |         |         |         |                                                                   |    |         |
|                            |    |        |         |         |         |                              |    |        |         |         |         |                                                                   |    |         |
|                            |    |        |         |         |         |                              |    |        |         |         |         |                                                                   |    |         |
|                            |    |        |         |         |         |                              |    |        |         |         |         |                                                                   |    |         |
|                            |    |        |         |         |         |                              |    |        |         |         |         |                                                                   |    |         |
|                            |    |        |         |         |         |                              |    |        |         |         |         |                                                                   |    |         |
|                            |    |        |         |         |         |                              |    |        |         |         |         |                                                                   |    |         |
|                            |    |        |         |         |         |                              |    |        |         |         |         |                                                                   |    |         |
|                            |    |        |         |         |         |                              |    |        |         |         |         |                                                                   |    |         |
|                            |    |        |         |         |         |                              |    |        |         |         |         |                                                                   |    |         |
|                            |    |        |         |         |         |                              |    |        |         |         |         |                                                                   |    |         |
|                            |    |        |         |         |         |                              |    |        |         |         |         |                                                                   |    |         |
|                            |    |        |         |         |         |                              |    |        |         |         |         |                                                                   |    |         |
|                            |    |        |         |         |         |                              |    |        |         |         |         |                                                                   |    |         |
|                            |    |        |         |         |         |                              |    |        |         |         |         |                                                                   |    |         |
|                            |    |        |         |         |         |                              |    |        |         |         |         |                                                                   |    |         |
|                            |    |        |         |         |         |                              |    |        |         |         |         |                                                                   |    |         |
|                            |    |        |         |         |         |                              |    |        |         |         |         |                                                                   |    |         |
|                            |    |        |         |         |         |                              |    |        |         |         |         |                                                                   |    |         |
|                            |    |        |         |         |         |                              |    |        |         |         |         |                                                                   |    |         |
|                            |    |        |         |         |         |                              |    |        |         |         |         |                                                                   |    |         |
|                            |    |        |         |         |         |                              |    |        |         |         |         |                                                                   |    |         |
|                            |    |        |         |         |         |                              |    |        |         |         |         |                                                                   |    |         |
|                            |    |        |         |         |         |                              |    |        |         |         |         |                                                                   |    |         |
|                            |    |        |         |         |         |                              |    |        |         |         |         |                                                                   |    |         |
|                            |    |        |         |         |         |                              |    |        |         |         |         |                                                                   |    |         |
|                            |    |        |         |         |         |                              |    |        |         |         |         |                                                                   |    |         |
|                            |    |        |         |         |         |                              |    |        |         |         |         |                                                                   |    |         |
|                            |    |        |         |         |         |                              |    |        |         |         |         |                                                                   |    |         |
|                            |    |        |         |         |         |                              |    |        |         |         |         |                                                                   |    |         |
|                            |    |        |         |         |         |                              |    |        |         |         |         |                                                                   |    |         |
|                            |    |        |         |         |         |                              |    |        |         |         |         |                                                                   |    |         |
|                            |    |        |         |         |         |                              |    |        |         |         |         |                                                                   |    |         |
|                            |    |        |         |         |         |                              |    |        |         |         |         |                                                                   |    |         |
|                            |    |        |         |         |         |                              |    |        |         |         |         |                                                                   |    |         |
|                            |    |        |         |         |         |                              |    |        |         |         |         |                                                                   |    |         |
|                            |    |        |         |         |         |                              |    |        |         |         |         |                                                                   |    |         |
|                            |    |        |         |         |         |                              |    |        |         |         |         |                                                                   |    |         |
|                            |    |        |         |         |         |                              |    |        |         |         |         |                                                                   |    |         |
|                            |    |        |         |         |         |                              |    |        |         |         |         |                                                                   |    |         |
|                            |    |        |         |         |         |                              |    |        |         |         |         |                                                                   |    |         |
|                            |    |        |         |         |         |                              |    |        |         |         |         |                                                                   |    |         |
|                            |    |        |         |         |         |                              |    |        |         |         |         |                                                                   |    |         |
|                            |    |        |         |         |         |                              |    |        |         |         |         |                                                                   |    |         |
|                            |    |        |         |         |         |                              |    |        |         |         |         |                                                                   |    |         |



# Supplementary

## *Sarcophyton glaucum*

|           | Df | Sum Sq | Mean Sq | F value | P value |
|-----------|----|--------|---------|---------|---------|
| Condition | 3  | 0.09   | 0.03    | 9.10    | 0.0002  |
| Residuals | 28 | 0.09   | 0.003   |         |         |

  

|                                                   | Estimate | SE   | Df | t.ratio | P value (fdr) |
|---------------------------------------------------|----------|------|----|---------|---------------|
| Control - NO <sub>3</sub>                         | -0.06    | 0.03 | 28 | -2.02   | 0.20          |
| Control - NO <sub>3</sub> PO <sub>4</sub>         | -0.10    | 0.03 | 28 | -3.49   | 0.01          |
| Control - PO <sub>4</sub>                         | 0.04     | 0.03 | 28 | 1.33    | 0.56          |
| NO <sub>3</sub> - NO <sub>3</sub> PO <sub>4</sub> | -0.04    | 0.03 | 28 | -1.47   | 0.47          |
| NO <sub>3</sub> PO <sub>4</sub> - PO <sub>4</sub> | 0.14     | 0.03 | 28 | 4.82    | < 0.001       |
| NO <sub>3</sub> - PO <sub>4</sub>                 | 0.10     | 0.03 | 28 | 3.35    | 0.01          |

## *Turbinaria reniformis*

|           | Df | Sum Sq | Mean Sq | F value | P value |
|-----------|----|--------|---------|---------|---------|
| Condition | 3  | 0.021  | 0.007   | 6.612   | 0.002   |
| Residuals | 28 | 0.029  | 0.001   |         |         |

  

|                                                   | Estimate | SE   | Df | t.ratio | P value (fdr) |
|---------------------------------------------------|----------|------|----|---------|---------------|
| Control - NO <sub>3</sub>                         | 0.05     | 0.02 | 28 | 3.33    | 0.01          |
| Control - NO <sub>3</sub> PO <sub>4</sub>         | 0.01     | 0.02 | 28 | 0.43    | 0.97          |
| Control - PO <sub>4</sub>                         | -0.01    | 0.02 | 28 | -0.87   | 0.82          |
| NO <sub>3</sub> - NO <sub>3</sub> PO <sub>4</sub> | -0.05    | 0.02 | 28 | -2.90   | 0.03          |
| NO <sub>3</sub> PO <sub>4</sub> - PO <sub>4</sub> | -0.02    | 0.02 | 28 | -1.29   | 0.58          |
| NO <sub>3</sub> - PO <sub>4</sub>                 | -0.07    | 0.02 | 28 | -4.19   | 0.00          |

## Comparison *S. glaucum* vs *T. reniformis* in control condition

| Wilcoxon rank sum test |         |
|------------------------|---------|
| W                      | p-value |
| 44                     | 0.23    |

## Carbohydrate per Ash free dry weight

### *Sarcophyton glaucum*

|           | Df | Sum Sq | Mean Sq | F value | P value  |
|-----------|----|--------|---------|---------|----------|
| Condition | 3  | 9.49   | 3.16    | 19.19   | < 0.0001 |
| Residuals | 19 | 3.13   | 0.16    |         |          |

  

|                                                   | Estimate | SE   | Df | t.ratio | P value (fdr) |
|---------------------------------------------------|----------|------|----|---------|---------------|
| Control - NO <sub>3</sub>                         | 1.05     | 0.25 | 19 | 4.29    | 0.008         |
| Control - NO <sub>3</sub> PO <sub>4</sub>         | -0.07    | 0.25 | 19 | -0.26   | 0.79          |
| Control - PO <sub>4</sub>                         | -0.70    | 0.25 | 19 | -2.84   | 0.02          |
| NO <sub>3</sub> - NO <sub>3</sub> PO <sub>4</sub> | -1.12    | 0.23 | 19 | -4.77   | 0.004         |
| NO <sub>3</sub> PO <sub>4</sub> - PO <sub>4</sub> | -0.63    | 0.23 | 19 | -2.71   | 0.02          |
| NO <sub>3</sub> - PO <sub>4</sub>                 | -1.75    | 0.23 | 19 | -7.48   | < 0.001       |

### *Turbinaria reniformis*

|           | Df | Sum Sq | Mean Sq | F value | P value |
|-----------|----|--------|---------|---------|---------|
| Condition | 3  | 11.45  | 3.82    | 5.92    | 0.00    |
| Residuals | 19 | 12.25  | 0.64    |         |         |

  

|                                                   | Estimate | SE   | Df | t.ratio | P value (fdr) |
|---------------------------------------------------|----------|------|----|---------|---------------|
| Control - NO <sub>3</sub>                         | -1.05    | 0.46 | 19 | -2.27   | 0.14          |
| Control - NO <sub>3</sub> PO <sub>4</sub>         | -1.66    | 0.49 | 19 | -3.41   | 0.01          |
| Control - PO <sub>4</sub>                         | -1.76    | 0.46 | 19 | -3.80   | 0.01          |
| NO <sub>3</sub> - NO <sub>3</sub> PO <sub>4</sub> | -0.60    | 0.49 | 19 | -1.24   | 0.61          |
| NO <sub>3</sub> PO <sub>4</sub> - PO <sub>4</sub> | -0.10    | 0.49 | 19 | -0.21   | 1.00          |
| NO <sub>3</sub> - PO <sub>4</sub>                 | -0.71    | 0.46 | 19 | -1.53   | 0.44          |

## Comparison *S. glaucum* vs *T. reniformis* in control condition

| Welch two sample t-test |    |         |
|-------------------------|----|---------|
| t                       | df | p-value |
| 2.29                    | 6  | 0.06    |

## Lipid per Ash free dry weight

### *Sarcophyton glaucum*

|           | Df | Sum Sq | Mean Sq | F value | P value |
|-----------|----|--------|---------|---------|---------|
| Condition | 3  | 47296  | 15765   | 0.89    | 0.46    |
| Residuals | 20 | 352694 | 17635   |         |         |

### *Turbinaria reniformis*

|           | Df | Kruskal-Wallis Chi-squared | P value |
|-----------|----|----------------------------|---------|
| Condition | 3  | 11.1                       | 0.02    |

  

|                                                   | Estimate | SE   | Df | t.ratio | P value (fdr) |
|---------------------------------------------------|----------|------|----|---------|---------------|
| Control - NO <sub>3</sub>                         | -4.88    | 3.33 | 20 | -1.47   | 0.22          |
| Control - NO <sub>3</sub> PO <sub>4</sub>         | -9.90    | 3.33 | 20 | -2.98   | 0.03          |
| Control - PO <sub>4</sub>                         | -0.31    | 3.33 | 20 | -0.09   | 0.93          |
| NO <sub>3</sub> - NO <sub>3</sub> PO <sub>4</sub> | -5.02    | 3.33 | 20 | -1.51   | 0.22          |
| NO <sub>3</sub> PO <sub>4</sub> - PO <sub>4</sub> | 9.59     | 3.33 | 20 | 2.88    | 0.03          |
| NO <sub>3</sub> - PO <sub>4</sub>                 | 4.56     | 3.33 | 20 | 1.37    | 0.22          |

## Comparison *S. glaucum* vs *T. reniformis* in control condition

| Welch two sample t-test |    |         |
|-------------------------|----|---------|
| t                       | df | p-value |
| 7.77                    | 5  | 0.001   |

Supplementary

b. Elemental composition and stoichiometry

Carbon content per ash free dry weight

| <i>Sarcophyton glaucum</i> |    |                            |         | <i>Turbinaria reniformis</i>                      |          |                            |         | <i>Comparison S. glaucum vs T. reniformis in control condition</i> |               |
|----------------------------|----|----------------------------|---------|---------------------------------------------------|----------|----------------------------|---------|--------------------------------------------------------------------|---------------|
| Condition                  | Df | Kruskal-Wallis Chi-squared | P value | Condition                                         | Df       | Kruskal-Wallis Chi-squared | P value | Wilcoxon rank sum test                                             |               |
|                            | 3  | 2.27                       | 0.52    |                                                   | 3        | 10.70                      | 0.01    | W                                                                  | p-value       |
|                            |    |                            |         |                                                   |          |                            |         | 16                                                                 | 0.03          |
|                            |    |                            |         |                                                   | Estimate | SE                         | Df      | t.ratio                                                            | P value (fdr) |
|                            |    |                            |         | Control - NO <sub>3</sub>                         | -10.79   | 5.013                      | 12      | -2.15                                                              | 0.19          |
|                            |    |                            |         | Control - NO <sub>3</sub> PO <sub>4</sub>         | -15.12   | 5.013                      | 12      | -3.02                                                              | 0.05          |
|                            |    |                            |         | Control - PO <sub>4</sub>                         | -22.72   | 5.013                      | 12      | -4.53                                                              | 0.003         |
|                            |    |                            |         | NO <sub>3</sub> - NO <sub>3</sub> PO <sub>4</sub> | -4.329   | 5.013                      | 12      | -0.86                                                              | 0.82          |
|                            |    |                            |         | NO <sub>3</sub> PO <sub>4</sub> - PO <sub>4</sub> | -7.599   | 5.013                      | 12      | -1.52                                                              | 0.46          |
|                            |    |                            |         | NO <sub>3</sub> - PO <sub>4</sub>                 | -11.927  | 5.013                      | 12      | -2.38                                                              | 0.13          |

Nitrogen content per ash free dry weight

| <i>Sarcophyton glaucum</i> |    |                            |         | <i>Turbinaria reniformis</i>                      |          |                            |         | <i>Comparison S. glaucum vs T. reniformis in control condition</i> |               |
|----------------------------|----|----------------------------|---------|---------------------------------------------------|----------|----------------------------|---------|--------------------------------------------------------------------|---------------|
| Condition                  | Df | Kruskal-Wallis Chi-squared | P value | Condition                                         | Df       | Kruskal-Wallis Chi-squared | P value | Wilcoxon rank sum test                                             |               |
|                            | 3  | 1.74                       | 0.63    |                                                   | 3        | 8.63                       | 0.03    | W                                                                  | p-value       |
|                            |    |                            |         |                                                   |          |                            |         | 16                                                                 | 0.03          |
|                            |    |                            |         |                                                   | Estimate | SE                         | Df      | t.ratio                                                            | P value (fdr) |
|                            |    |                            |         | Control - NO <sub>3</sub>                         | -2.72    | 0.89                       | 12      | -3.06                                                              | 0.03          |
|                            |    |                            |         | Control - NO <sub>3</sub> PO <sub>4</sub>         | -2.36    | 0.89                       | 12      | -2.65                                                              | 0.04          |
|                            |    |                            |         | Control - PO <sub>4</sub>                         | -3.93    | 0.89                       | 12      | -4.41                                                              | 0.01          |
|                            |    |                            |         | NO <sub>3</sub> - NO <sub>3</sub> PO <sub>4</sub> | 0.36     | 0.89                       | 12      | 0.41                                                               | 0.69          |
|                            |    |                            |         | NO <sub>3</sub> PO <sub>4</sub> - PO <sub>4</sub> | -1.57    | 0.89                       | 12      | -1.76                                                              | 0.16          |
|                            |    |                            |         | NO <sub>3</sub> - PO <sub>4</sub>                 | -1.21    | 0.89                       | 12      | -1.35                                                              | 0.24          |

Carbon : Nitrogen ratio per ash free dry weight

| <i>Sarcophyton glaucum</i> |    |                            |         | <i>Turbinaria reniformis</i>                      |          |                            |         | <i>Comparison S. glaucum vs T. reniformis in control condition</i> |               |
|----------------------------|----|----------------------------|---------|---------------------------------------------------|----------|----------------------------|---------|--------------------------------------------------------------------|---------------|
| Condition                  | Df | Kruskal-Wallis Chi-squared | P value | Condition                                         | Df       | Kruskal-Wallis Chi-squared | P value | Wilcoxon rank sum test                                             |               |
|                            | 3  | 1.57                       | 0.67    |                                                   | 3        | 9.55                       | 0.02    | W                                                                  | p-value       |
|                            |    |                            |         |                                                   |          |                            |         | 16                                                                 | 0.03          |
|                            |    |                            |         |                                                   | Estimate | SE                         | Df      | t.ratio                                                            | P value (fdr) |
|                            |    |                            |         | Control - NO <sub>3</sub>                         | 1.46     | 0.51                       | 12      | 2.88                                                               | 0.08          |
|                            |    |                            |         | Control - NO <sub>3</sub> PO <sub>4</sub>         | 0.34     | 0.51                       | 12      | 0.67                                                               | 0.52          |
|                            |    |                            |         | Control - PO <sub>4</sub>                         | 0.76     | 0.51                       | 12      | 1.50                                                               | 0.29          |
|                            |    |                            |         | NO <sub>3</sub> - NO <sub>3</sub> PO <sub>4</sub> | -1.12    | 0.51                       | 12      | -2.21                                                              | 0.14          |
|                            |    |                            |         | NO <sub>3</sub> PO <sub>4</sub> - PO <sub>4</sub> | 0.42     | 0.51                       | 12      | 0.83                                                               | 0.51          |
|                            |    |                            |         | NO <sub>3</sub> - PO <sub>4</sub>                 | -0.70    | 0.51                       | 12      | -1.37                                                              | 0.29          |

Supplementary

| Phosphorus content                                  |    |                            |         |         |         |                              |    |                                                   |         |                                                                    |         |                         |         |         |  |
|-----------------------------------------------------|----|----------------------------|---------|---------|---------|------------------------------|----|---------------------------------------------------|---------|--------------------------------------------------------------------|---------|-------------------------|---------|---------|--|
| <i>Sarcophyton glaucum</i>                          |    |                            |         |         |         | <i>Turbinaria reniformis</i> |    |                                                   |         | <i>Comparaison S. glaucum vs T.reniformis in control condition</i> |         |                         |         |         |  |
| Condition                                           | Df | Kruskal-Wallis Chi-squared |         | P value |         | Condition                    | Df | Kruskal-Wallis Chi-squared                        |         | P value                                                            |         | Welch two sample t-test |         |         |  |
|                                                     | 3  | 0.71                       |         | 0.87    |         |                              | 3  | 5.38                                              |         | 0.15                                                               |         | t                       | df      | p-value |  |
|                                                     |    |                            |         |         |         |                              |    |                                                   |         |                                                                    |         | 0.21                    | 3       | 0.85    |  |
| Carbon : Phosphorus ratio per ash free dry weight   |    |                            |         |         |         |                              |    |                                                   |         |                                                                    |         |                         |         |         |  |
| <i>Sarcophyton glaucum</i>                          |    |                            |         |         |         | <i>Turbinaria reniformis</i> |    |                                                   |         | <i>Comparaison S. glaucum vs T.reniformis in control condition</i> |         |                         |         |         |  |
| Condition                                           | Df | Sum Sq                     | Mean Sq | F value | P value | Condition                    | Df | Kruskal-Wallis Chi-squared                        |         | P value                                                            |         | Wilcoxon rank sum test  |         |         |  |
|                                                     | 3  | 15704                      | 5235    | 0.07    | 0.97    |                              | 3  | 9.73                                              |         | 0.02                                                               |         | W                       | p-value |         |  |
| Residuals                                           | 12 | 855414                     | 71284   |         |         |                              |    |                                                   |         |                                                                    |         | 16                      | 0.029   |         |  |
|                                                     |    |                            |         |         |         |                              |    | Estimate                                          | SE      | Df                                                                 | t.ratio | P value (fdr)           |         |         |  |
|                                                     |    |                            |         |         |         |                              |    | Control - NO <sub>3</sub>                         | -163.37 | 55.97                                                              | 12      | -2.92                   | 0.05    |         |  |
|                                                     |    |                            |         |         |         |                              |    | Control - NO <sub>3</sub> PO <sub>4</sub>         | -158.60 | 55.97                                                              | 12      | -2.83                   | 0.06    |         |  |
|                                                     |    |                            |         |         |         |                              |    | Control - PO <sub>4</sub>                         | -42.74  | 55.97                                                              | 12      | -0.76                   | 0.87    |         |  |
|                                                     |    |                            |         |         |         |                              |    | NO <sub>3</sub> - NO <sub>3</sub> PO <sub>4</sub> | 4.77    | 55.97                                                              | 12      | 0.09                    | 1.00    |         |  |
|                                                     |    |                            |         |         |         |                              |    | NO <sub>3</sub> PO <sub>4</sub> - PO <sub>4</sub> | 115.86  | 55.97                                                              | 12      | 2.07                    | 0.22    |         |  |
|                                                     |    |                            |         |         |         |                              |    | NO <sub>3</sub> - PO <sub>4</sub>                 | 120.63  | 55.97                                                              | 12      | 2.16                    | 0.19    |         |  |
| Nitrogen : Phosphorus ratio per ash free dry weight |    |                            |         |         |         |                              |    |                                                   |         |                                                                    |         |                         |         |         |  |
| <i>Sarcophyton glaucum</i>                          |    |                            |         |         |         | <i>Turbinaria reniformis</i> |    |                                                   |         | <i>Comparaison S. glaucum vs T.reniformis in control condition</i> |         |                         |         |         |  |
| Condition                                           | Df | Kruskal-Wallis Chi-squared |         | P value |         | Condition                    | Df | Kruskal-Wallis Chi-squared                        |         | P value                                                            |         | Welch two sample t-test |         |         |  |
|                                                     | 3  | 3.0221                     |         | 0.3882  |         |                              | 3  | 9.7941                                            |         | 0.02                                                               |         | t                       | df      | p-value |  |
|                                                     |    |                            |         |         |         |                              |    |                                                   |         |                                                                    |         | 6.48                    | 3       | 0.004   |  |
|                                                     |    |                            |         |         |         |                              |    | Estimate                                          | SE      | Df                                                                 | t.ratio | P value (fdr)           |         |         |  |
|                                                     |    |                            |         |         |         |                              |    | Control - NO <sub>3</sub>                         | -35.74  | 9.5                                                                | 12      | -3.76                   | 0.01    |         |  |
|                                                     |    |                            |         |         |         |                              |    | Control - NO <sub>3</sub> PO <sub>4</sub>         | -25.15  | 9.5                                                                | 12      | -2.65                   | 0.09    |         |  |
|                                                     |    |                            |         |         |         |                              |    | Control - PO <sub>4</sub>                         | -10.46  | 9.5                                                                | 12      | -1.10                   | 0.70    |         |  |
|                                                     |    |                            |         |         |         |                              |    | NO <sub>3</sub> - NO <sub>3</sub> PO <sub>4</sub> | 10.59   | 9.5                                                                | 12      | 1.12                    | 0.69    |         |  |
|                                                     |    |                            |         |         |         |                              |    | NO <sub>3</sub> PO <sub>4</sub> - PO <sub>4</sub> | 14.68   | 9.5                                                                | 12      | 1.55                    | 0.44    |         |  |
|                                                     |    |                            |         |         |         |                              |    | NO <sub>3</sub> - PO <sub>4</sub>                 | 25.28   | 9.5                                                                | 12      | 2.66                    | 0.08    |         |  |

c. Dinoflagellate density and protein content

| Dinoflagellate density |
|------------------------|
|------------------------|

## Supplementary

*Sarcophyton glaucum*

|           | Df | Sum Sq | Mean Sq | F value | P value |
|-----------|----|--------|---------|---------|---------|
| Condition | 3  | 10087  | 3362.3  | 1.71    | 0.20    |
| Residuals | 20 | 39234  | 1961.7  |         |         |

*Turbinaria reniformis*

|                                                   | Df       | Sum Sq | Mean Sq | F value | P value       |
|---------------------------------------------------|----------|--------|---------|---------|---------------|
| Condition                                         | 3        | 0.15   | 55194   | 7.46    | 0.002         |
| Residuals                                         | 19       | 0.22   | 7403    |         |               |
|                                                   | Estimate | SE     | Df      | t.ratio | P value (fdr) |
| Control - NO <sub>3</sub>                         | 53.61    | 49.68  | 20      | 1.08    | 0.29          |
| Control - NO <sub>3</sub> PO <sub>4</sub>         | 108.84   | 49.68  | 20      | 2.19    | 0.06          |
| Control - PO <sub>4</sub>                         | 224.14   | 49.68  | 20      | 4.51    | 0.001         |
| NO <sub>3</sub> - NO <sub>3</sub> PO <sub>4</sub> | 55.23    | 49.68  | 20      | 1.11    | 0.29          |
| NO <sub>3</sub> PO <sub>4</sub> - PO <sub>4</sub> | 115.3    | 49.68  | 20      | 2.32    | 0.06          |
| NO <sub>3</sub> - PO <sub>4</sub>                 | 170.53   | 49.68  | 20      | 3.43    | 0.01          |

Comparison *S. glaucum* vs *T. reniformis* in control condition

| Welch two sample t-test |    |         |
|-------------------------|----|---------|
| t                       | df | p-value |
| -1.66                   | 6  | 0.14    |

## Protein holobiont content

*Sarcophyton glaucum*

|                                                   | Df       | Sum Sq | Mean Sq | F value | P value       |
|---------------------------------------------------|----------|--------|---------|---------|---------------|
| Condition                                         | 3        | 5726.5 | 1908.83 | 5.6226  | 0.005809      |
| Residuals                                         | 20       | 6789.9 | 339.49  |         |               |
|                                                   | Estimate | SE     | Df      | t.ratio | P value (fdr) |
| Control - NO <sub>3</sub>                         | 6.99     | 10.6   | 20      | 0.66    | 0.52          |
| Control - NO <sub>3</sub> PO <sub>4</sub>         | -9.94    | 10.6   | 20      | -0.93   | 0.43          |
| Control - PO <sub>4</sub>                         | -33.84   | 10.6   | 20      | -3.18   | 0.01          |
| NO <sub>3</sub> - NO <sub>3</sub> PO <sub>4</sub> | -16.93   | 10.6   | 20      | -1.59   | 0.19          |
| NO <sub>3</sub> PO <sub>4</sub> - PO <sub>4</sub> | -23.90   | 10.6   | 20      | -2.25   | 0.07          |
| NO <sub>3</sub> - PO <sub>4</sub>                 | -40.23   | 10.6   | 20      | -3.84   | 0.01          |

*Turbinaria reniformis*

|                                                   | Df       | Sum Sq | Mean Sq | F value | P value       |
|---------------------------------------------------|----------|--------|---------|---------|---------------|
| Condition                                         | 3        | 1952.9 | 650.97  | 4.43    | 0.02          |
| Residuals                                         | 19       | 2789.3 | 146.81  |         |               |
|                                                   | Estimate | SE     | Df      | t.ratio | P value (fdr) |
| Control - NO <sub>3</sub>                         | -8.7     | 7      | 19      | -1.24   | 0.34          |
| Control - NO <sub>3</sub> PO <sub>4</sub>         | -6.56    | 7      | 19      | -0.94   | 0.43          |
| Control - PO <sub>4</sub>                         | 15.8     | 7.34   | 19      | 2.15    | 0.09          |
| NO <sub>3</sub> - NO <sub>3</sub> PO <sub>4</sub> | 2.14     | 7      | 19      | 0.31    | 0.76          |
| NO <sub>3</sub> PO <sub>4</sub> - PO <sub>4</sub> | 22.36    | 7.34   | 19      | 3.05    | 0.02          |
| NO <sub>3</sub> - PO <sub>4</sub>                 | 24.5     | 7.34   | 19      | 3.34    | 0.02          |

Comparison *S. glaucum* vs *T. reniformis* in control condition

| Wilcoxon rank sum test |         |
|------------------------|---------|
| W                      | p-value |
| 0                      | 0.002   |

### III Materials and Methods

Table S5. Example of nubbin repartition for the different measurements in one condition and one coral species

We used 6 nubbins per condition/species, with three nubbins from each aquarium

**Measurement 1:** Nutrient uptake rate, Photosynthesis rates, PAM, chlorophyll content, dinoflagellate density and protein content

**Measurement 2:** Lipid and carbohydrate content

**Measurement 3:** Lipid peroxidation (LPO) and non-enzymatic total antioxidant capacity (NETAC)

**Measurement 4:** Carbon, nitrogen and phosphorus content

|            | Nubbin number (each from a different colony) |   |   |   |   |   |   |   |   |    |    |    |
|------------|----------------------------------------------|---|---|---|---|---|---|---|---|----|----|----|
|            | 1                                            | 2 | 3 | 4 | 5 | 6 | 7 | 8 | 9 | 10 | 11 | 12 |
| Aquarium 1 | 1                                            | 3 | 4 | 2 | 3 | 1 |   | 4 | 2 | 1  | 3  | 2  |
| Aquarium 2 | 2                                            | 4 | 1 | 3 |   | 3 | 2 | 1 | 4 | 3  | 2  | 1  |

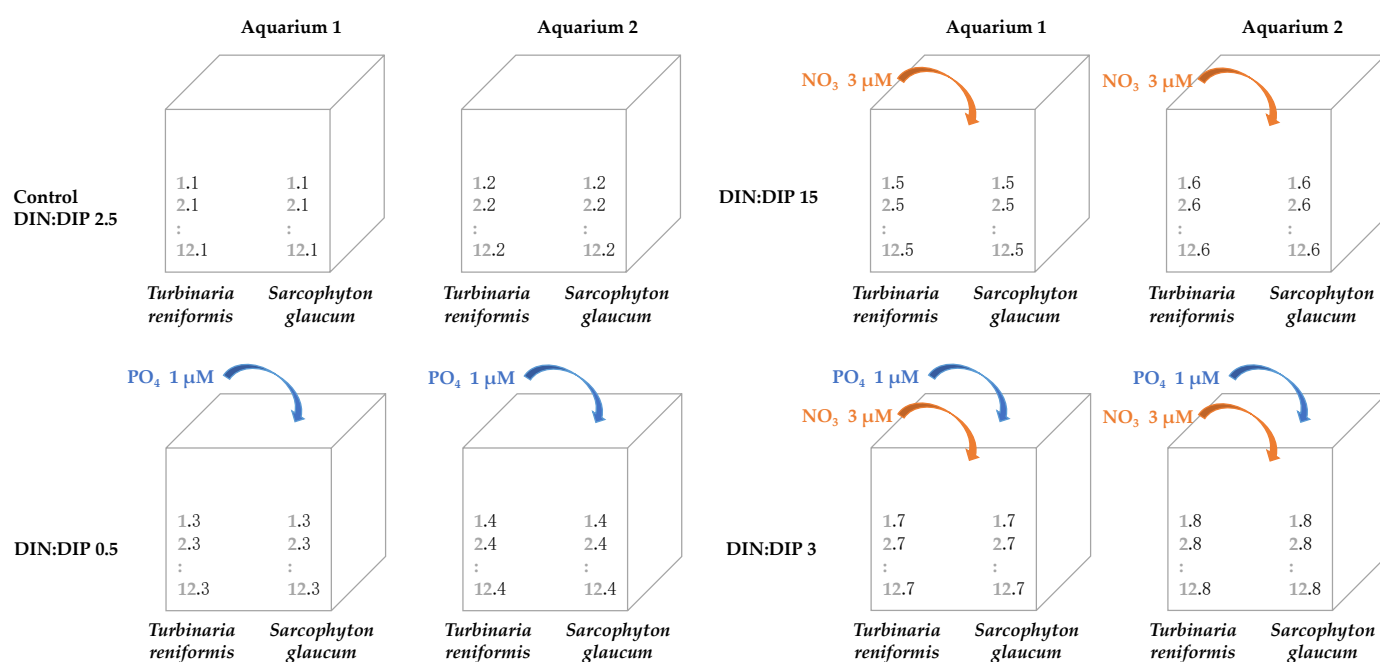

Figure S1. Summary of the experimental design and repartition of nubbins across treatment and aquaria.

Each aquarium has 24 nubbins in total, with 12 nubbins per species (*Turbinaria reniformis* and *Sarcophyton glaucum*). The **numbers from 1 to 12 in grey** represent the ID number of the mother colony. The **numbers from 1 to 8 in black** represent the id number of the nubbin cut from the mother colony. So in each aquaria there is one nubbin from each colony
